# Supplementary material for: CFTR mutation enhances Dishevelled degradation and results in impairment of Wnt-dependent hematopoiesis
Source: PubMed Central journal article supplement (PMC5833403; doi:10.1038/s41419-018-0311-9), 2018-02-15

**A**

|           |                                                                                                            |      |
|-----------|------------------------------------------------------------------------------------------------------------|------|
| Human     | MQRSEFEDSVVSKLDESWIRLDRAGYRQRLEISLIDKESVMSADLSEBLEREWDRDASRENRKRLINLRRCFFWRMFYEIFLIDGVYRAVQELDLGRITIASV    | 109  |
| Zebrafish | MQRSEFEDANCLSRLEFWINEDIRAGFKERRESLIDKESVMSADLSEBLEREWDRDASRENRKRESLIRAPRCYIKFLDFEFLIDGVYRAVQELDLGRITIASV   | 110  |
| Human     | EDNKRDESLIAYGIGLGLLIVRGLLIPAFHGLHHEMQRITMSEIYKRTLKLSSRVLDKISGQLVSLSENNLREDEG...LAIARFWVPLQVLDLGLIWE        | 217  |
| Zebrafish | EDARHEDRANGYFLAFGLGLITRGLLIPAFHGLHHEMQRITMSEIYKRTLKLSSRVLDKISGQLVSLSENNLREDEG...LAIARFWVPLQVLDLGLIWE       | 220  |
| Human     | ELQASLQCGGLIIVLAFKCEGRMMRFRICRAGKISQCVITISEWIDAKCVKAKQNEEDNEMRERLIDGTEALTRYAAYVYVNSSEFFSCGIVELSLTEFAL      | 327  |
| Zebrafish | ELIVNSLQGLAAISLQGLVLCGLSHRGGFKRQSVLLINFRALITSEIMQALSVKAGQWEDMPTLFRALIDGVWYTRKIGSLIYVNSSEFFSCGIVIVAAVVEFAL  | 330  |
| Human     | ITGILHREITFTIEFGVILNAYVTRQFNAVYINYSLGLDNRQIQFQCEQYITLQNTITLTVVMENVTFRDEGSELFRKQCNINNRKTSNGEDSEFFSFLG       | 437  |
| Zebrafish | SRGMRREITFTISQGVILNAYVTRQIGSITQAVYITNRIKWKIEEFLSREYVILNAYVITLSTITLLELQVITFRDEGSELFRKQCNINNRKTSNGEDSEFFSFLG | 438  |
| Human     | IFVLRDINFRIFERQQLAVVGSFAGKSLINLVMEGEPSSGRIHSGRISFGSGESWIMRGTIRLNLFGVSYDEYRQGVKACQLEELAALEKWKTFMADGGGLN     | 547  |
| Zebrafish | IFVLRDINFRIFERQQLAVVGSAGSGRSLINLVMEGEPSSGRIHSGRISFGSGESWIMRGTIRLNLFGVSYDEYRQGVKACQLEELAALEKWKTFMADGGGLN    | 548  |
| Human     | LSGGQARISLARAVVMDADLYLIDSEGYLIVLKEKTEESQCKIMAKIRLIVTSEHLEKADKILIRGSGSYFYGLTEIQLNLDPFSSVINGCDSEIQAER        | 657  |
| Zebrafish | LSGGQARVNLARAVVMDADLYLIDSEHTLILTEKTEIDRQCKIMAKIRLIVTSEHLEKADKILIRGSGSYFYGLTEIQLNLDPFSSVINGCDSEIQAER        | 658  |
| Human     | RSLITETLHRSLEGDFVSWTETKQSERQSG...EFGRRKNSLNNINSINWSEIVKTIPLQMNGLDEDEPLHRLSIVDSQGEAIPRISLISLTPILQAR         | 764  |
| Zebrafish | RSLITETLHRSVDESQMQPERSAFRQVFRKEMYIDRRAVWVNEGVWRASTLQVE.....EEVVRTLPIRKSILVNEGLVDESFMGSSVYHNRVVMAGQ         | 762  |
| Human     | RRCQSVNIMHSVNCQNIQRITIASLKVSLPQCANITPLDINSRISQFGLIISEEINPEDLKCFEDMESEPA...VYNNINRQVIVKSLIPLVWQVTF          | 870  |
| Zebrafish | RRCQSVLARNNAQCQRREPLQSSFRRLISVMESEASELDIYRRLSDS...YMTGILPEENIEQCTEIDEDETFETQNNIVYRQVSNKSLVYLIFLIFA         | 870  |
| Human     | LAVVPSLVVILVGL.....NTLQIGNSTFRNNSVAVIITSSSYVYVYVGVADTLAMGFFRGLFVHTITVSKLFRKMLSVLQAFMSLVNTVQAG              | 970  |
| Zebrafish | AVLQVAGVITITDELWREHQSEENWTRHNSASSGQVAVITVITSSYVILYVVAISELAMGFFRGLFVHTITVSKLFRKMLSVLQAFMSLVNTVQAG           | 980  |
| Human     | GLNRSKQDAILDDLPDITFDSIQULLIIVGADAVAVLQVYIVVIVAVIMLRVYFIQSQQLKQLESERSPTEHUVISLKGWLRARERQCYEFLFHK            | 1080 |
| Zebrafish | RVANRTRQDATTDDLPDMLFEDVYQVWVYVGLVWVSIIVFVITLQATELAIITVWRFYELRISQQLKQLETARSPISHLVLSLKGWLRARERQCYEFLFHK      | 1090 |
| Human     | ALNHTANWFLYSLTLRWFQMIEMIEVDFEAVTFSILITGEGEGRVGLILAMVNSLQWVNSSTVVSIMRSVSRVFRFIMETGRPTKSTPYKNGLSKY           | 1190 |
| Zebrafish | TANHTANWFLYSLTLRWFEDRADIIVDFEAVTFSILITGEGEGRVGLILAMVNSLQWVNSSTVVSIMRSVSRVFRFIMETGRPTKSTPYKNGLSKY           | 1193 |
| Human     | LVYENSHVRKDDINSGEQNIRLIRKRYTEGVAHIDENISFSISPGQRVGLGRTGSGKSHLSLFRILNTEGETIDGVSDSITLQWRKAFGVLPCKVFTSCTF      | 1300 |
| Zebrafish | LVIENVDQQLSSNHRGCIENRLLVRYTEGVAHIDENISFSISPGQRVGLGRTGSGKSHLSLFRILNTEGETIDGVSDSITLQWRKAFGVLPCKVFTSCTF       | 1303 |
| Human     | RNNLDEVEQKSTQDINWVADEVGIRSVIEQFHEKLDVYIVGGVLSHGKQVCLARSVLSGARILLDPEPSAHLDPVYQIIRRTMCAEALCVIICERIRDAMLEG    | 1410 |
| Zebrafish | RNNLDEVEGCHSEBEINWVADEVGIRSVIEQFHEKLDVYIVGGVLSHGKQVCLARSVLSGARILLDPEPSAHLDPVYQIIRRTMCAEALCVIICERIRDAMLEG   | 1413 |
| Human     | QDFVIEENVRQVDSIQKLLNERSLFRQAISESLVMLFERNSSKCKSKPQIA...AHEEIDEVQDTRL                                        | 1480 |
| Zebrafish | QDFVMMDRGQVRYVDSIQKLLNERSHLRQAISEAPRMLFERNSSMRTQCKLSSVIQICEPADNIDQDTRL                                     | 1487 |

**B**

|           |                 |      |
|-----------|-----------------|------|
| Human     | ALKEEIEEEVQDTRL | 1480 |
| Zebrafish | TLQEEAEDNIQDTRL | 1487 |

PDZ-binding domain

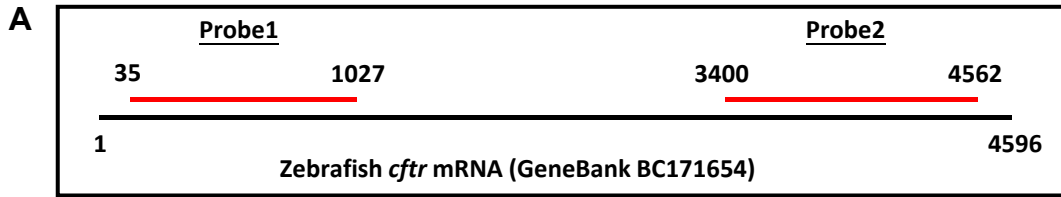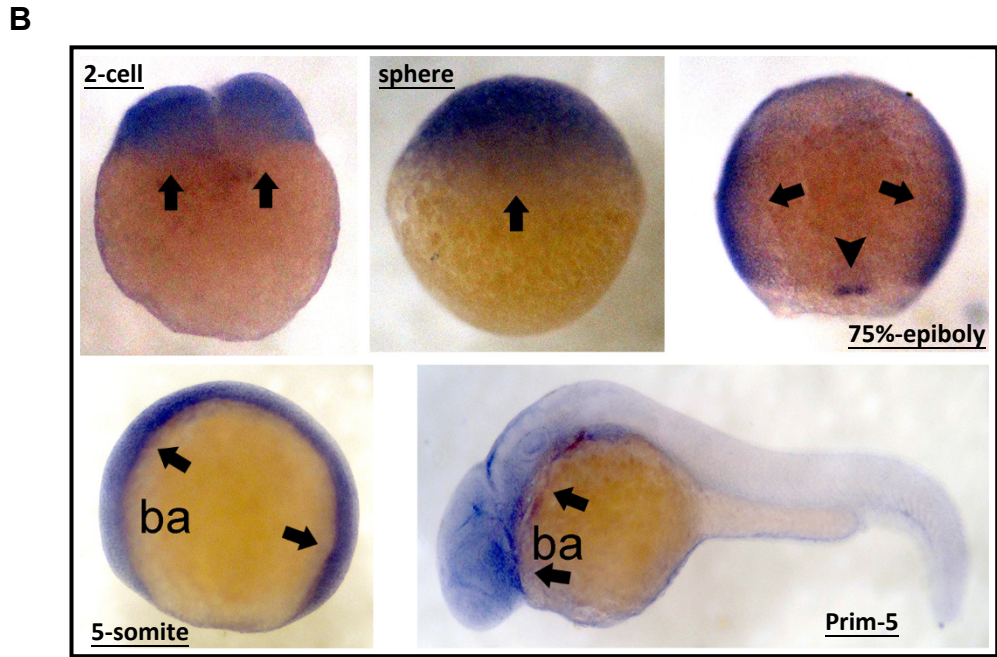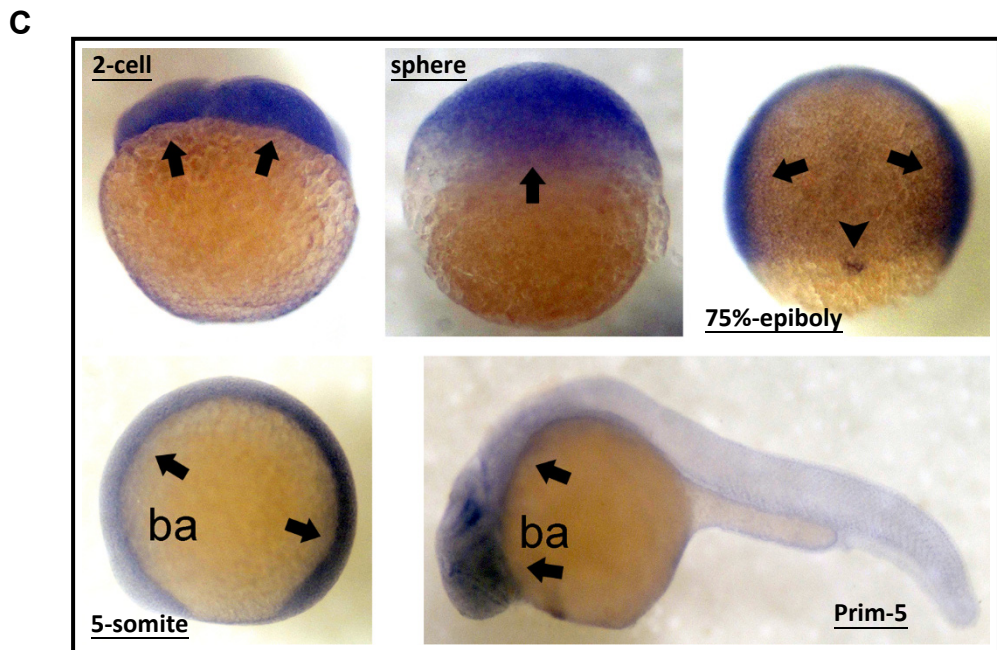

**A**

|                    |                                           |
|--------------------|-------------------------------------------|
| <i>cftr</i>        | CCCATTTTATATGGATATCACCACTGCAATGCATCCTGTG  |
| <i>cftr mutant</i> | CCCATTTTATATGGATATC...CACTGCAATGCATCCTGTG |

**B**

|                    |     |                                                              |
|--------------------|-----|--------------------------------------------------------------|
| <b>Cftr</b>        | 181 | LVSLMSANLGKFDQSLGMAHFIWISPLQCILCTGLIWELIDVNSFCALAAISLLGVLQAF |
|                    |     | .....:..:..                                                  |
| <b>Cftr mutant</b> | 181 | LVSLMSANLGKFDQSLGMAHFIWISTAMHVPYRAYLGH                       |

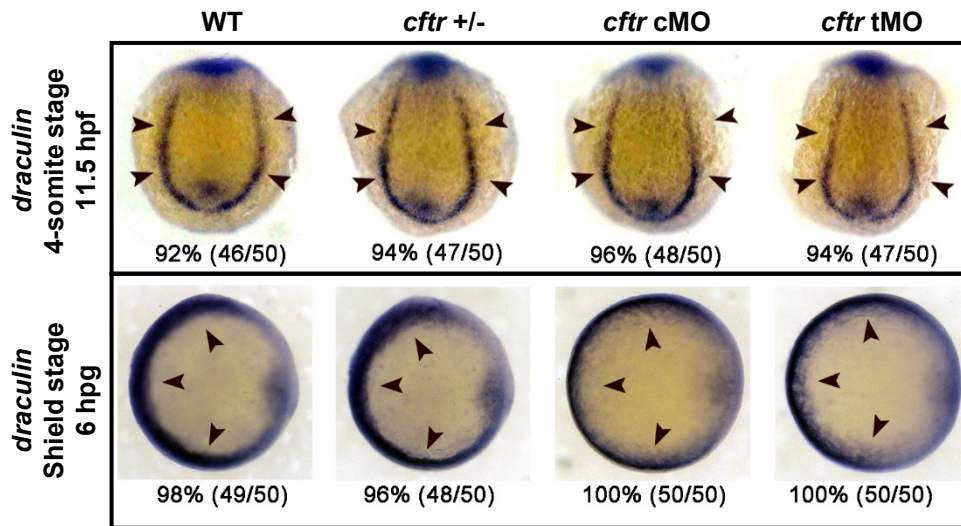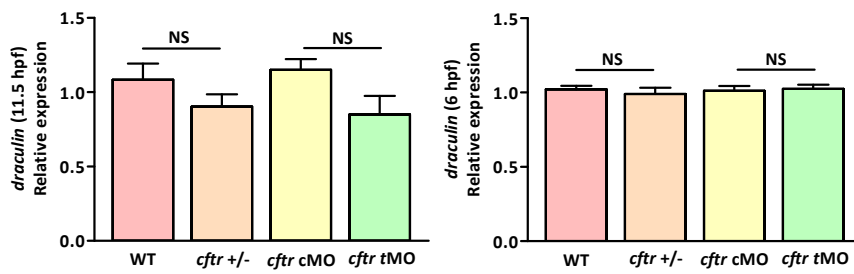

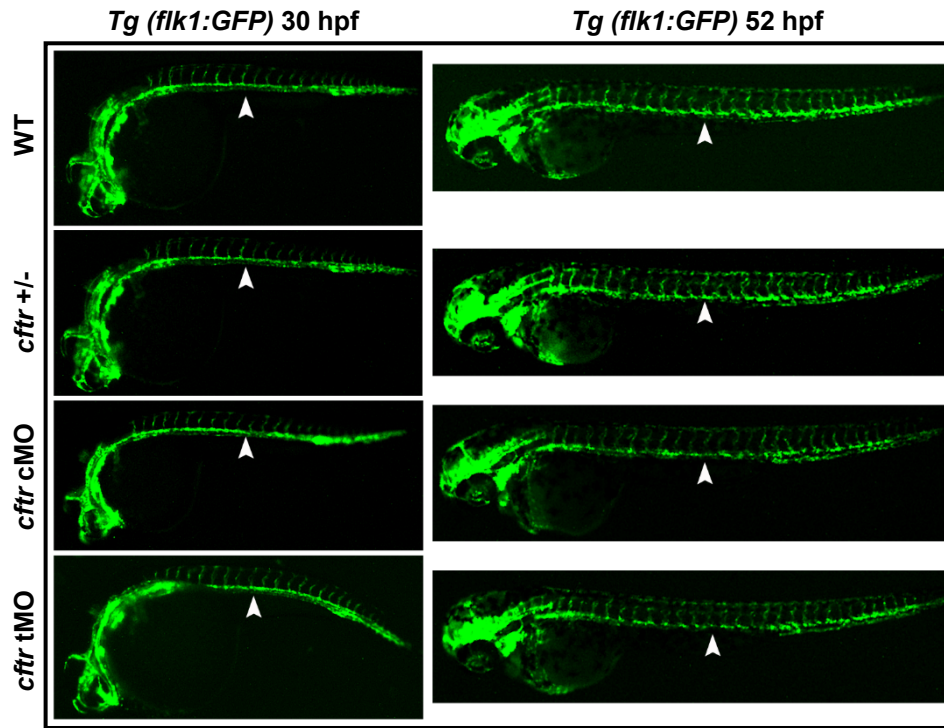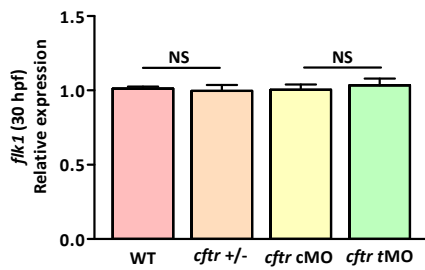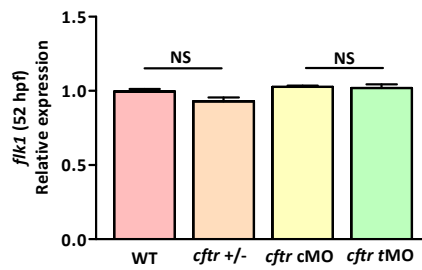

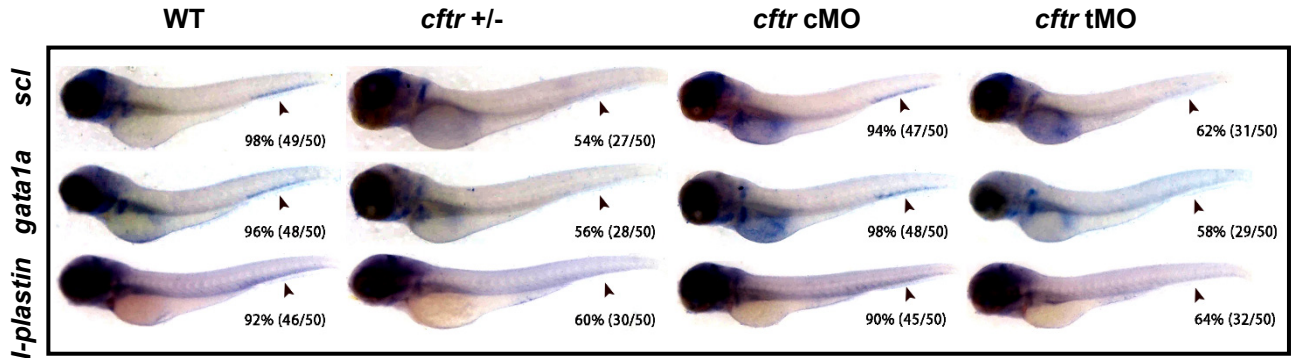

All embryos shown at 3 dpf stage

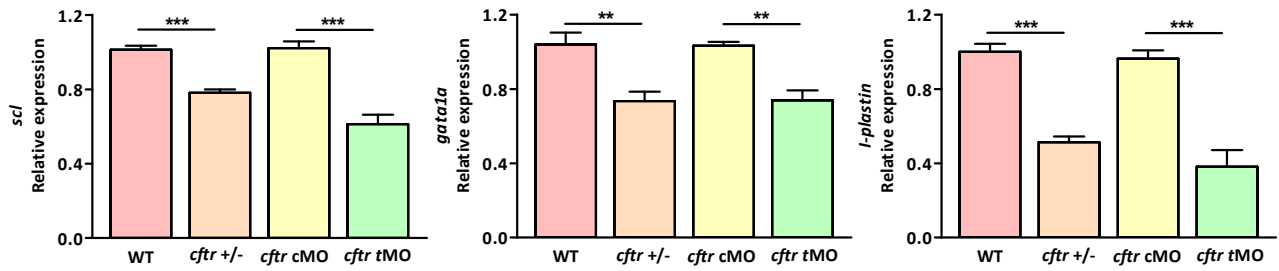

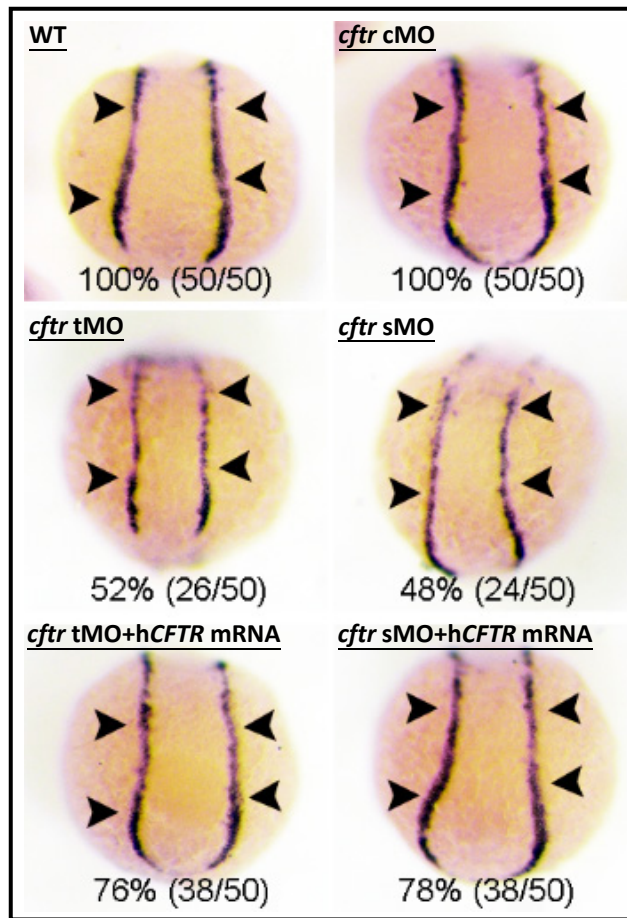

All embryos shown at 8-somite stage (13 hpf)

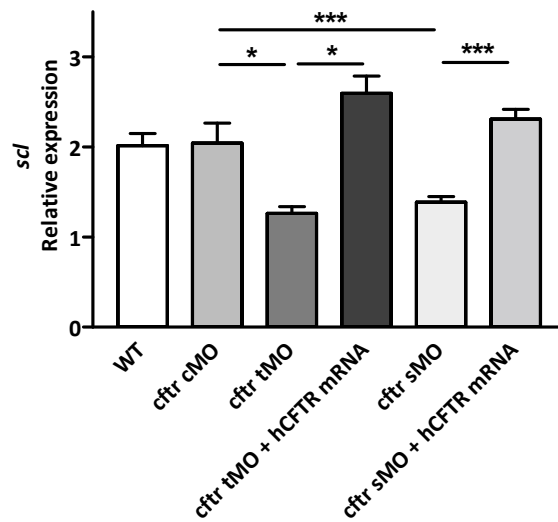

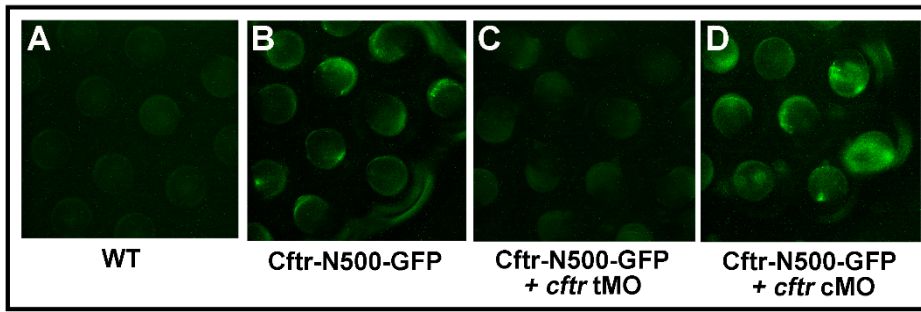

All embryos shown at 70%-epiboly stage (7.5 hpf)



**A**

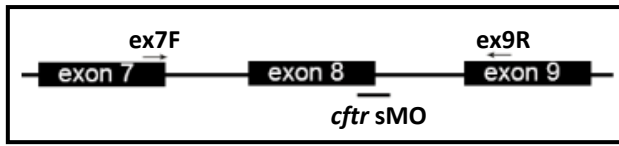

**B**

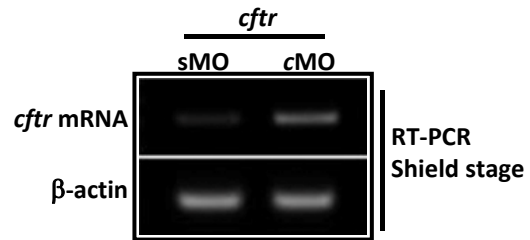

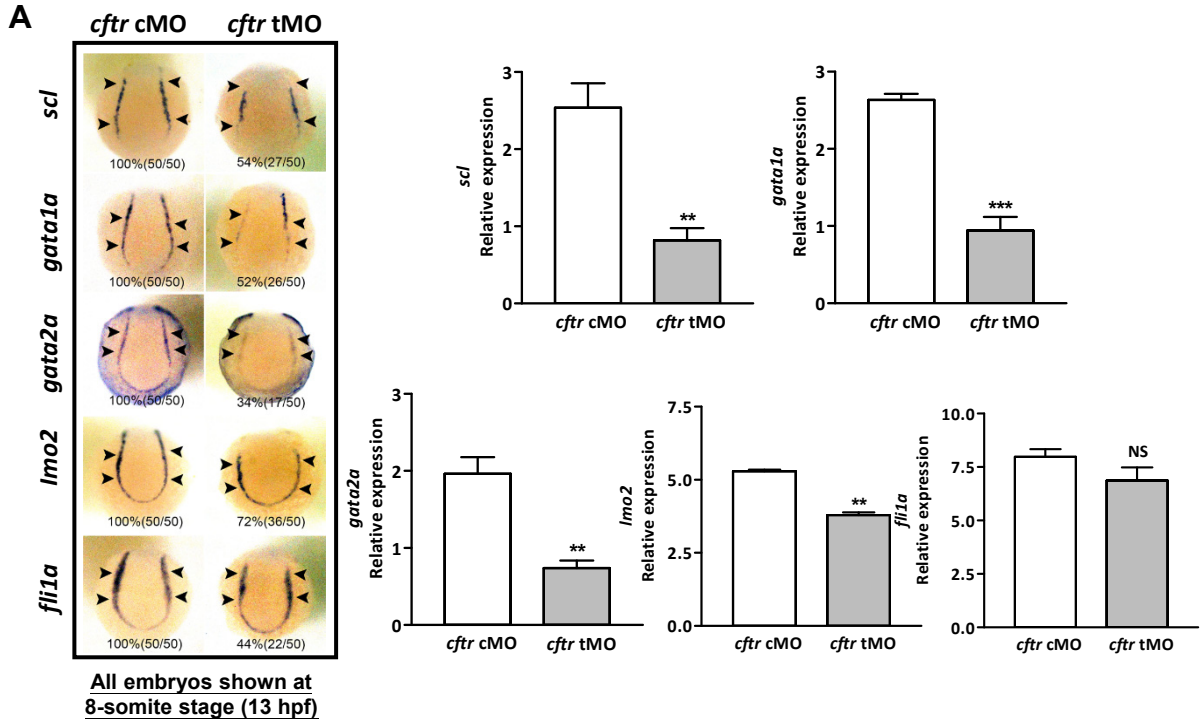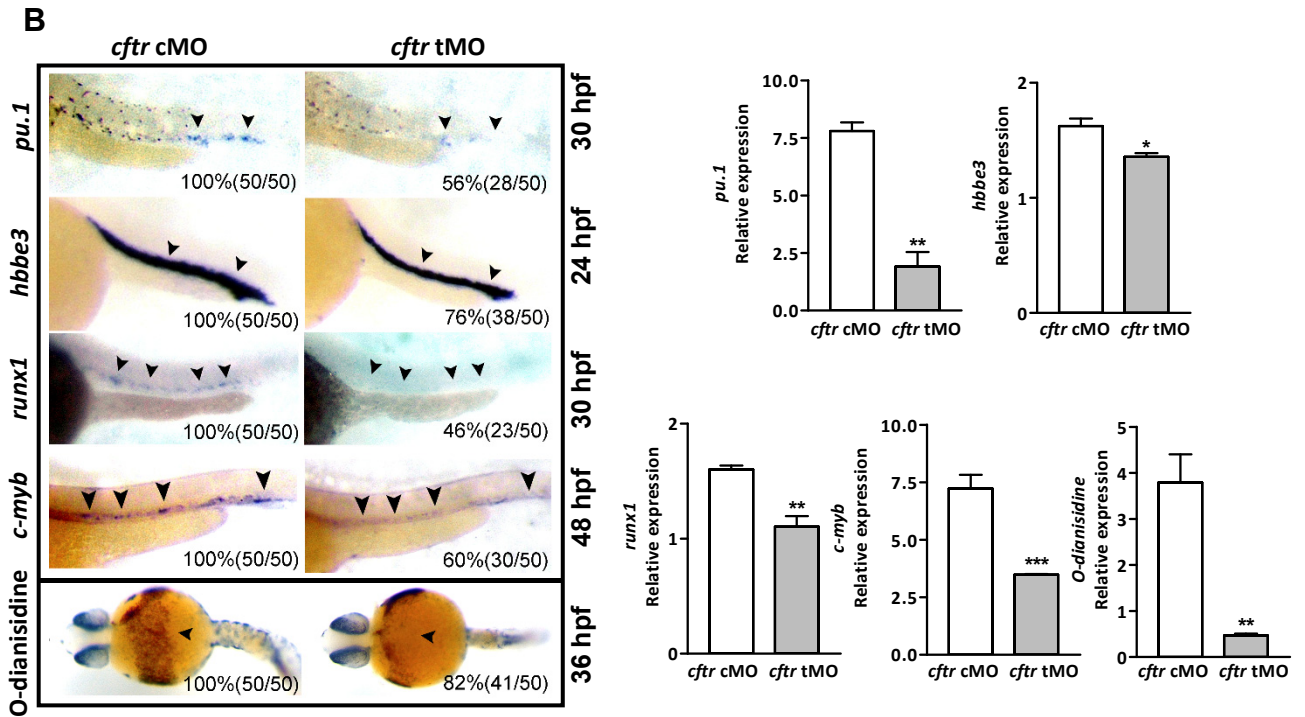

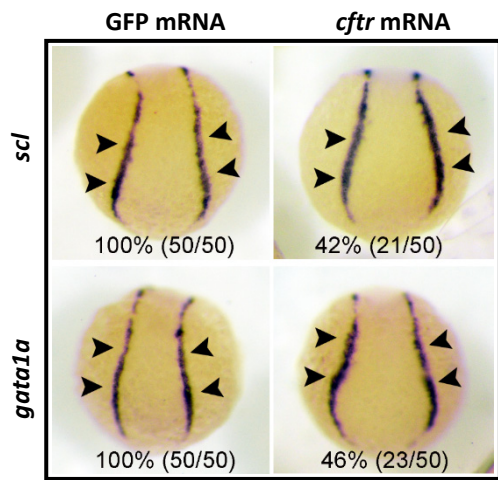

All embryos shown at 8-somite stage (13 hpf)

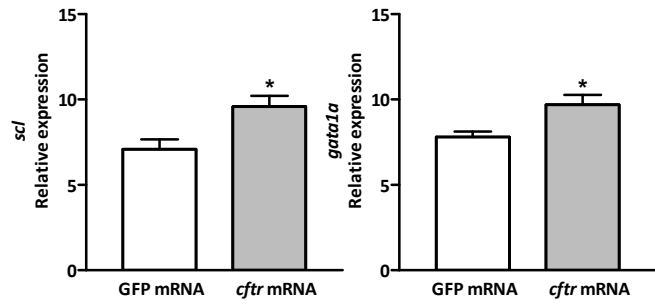

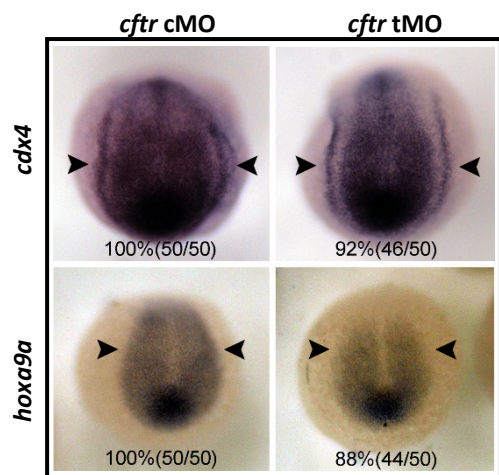

All embryos shown at 8-somite stage (13 hpf)

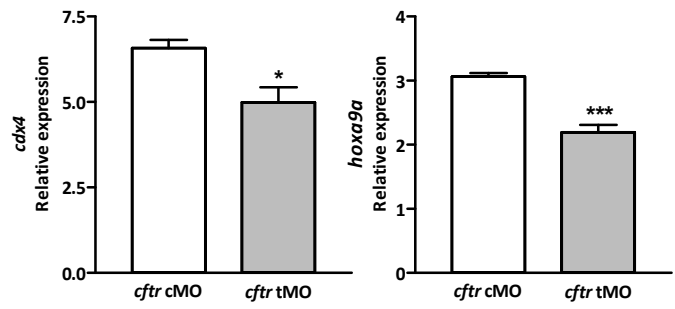

**A**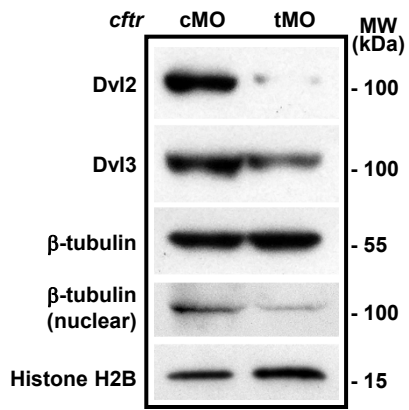**B**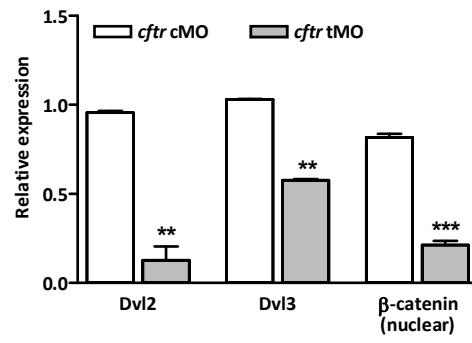

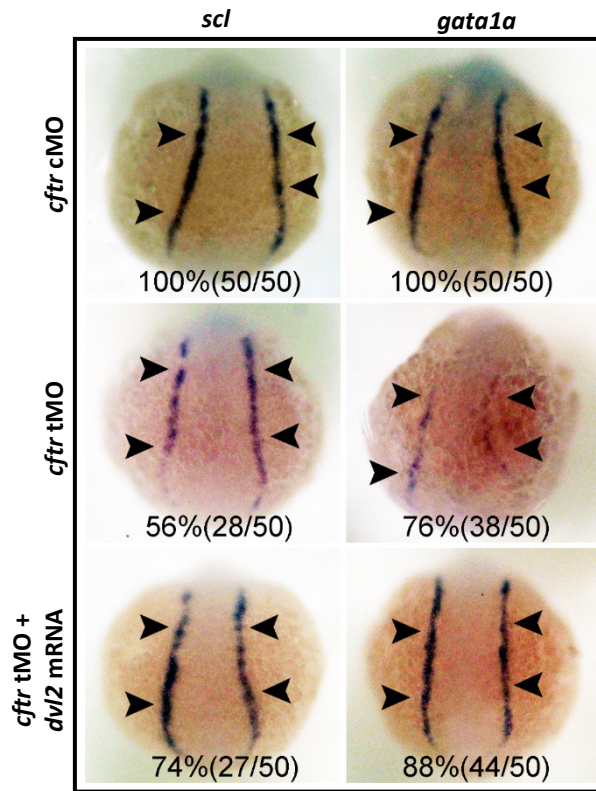

All embryos shown at 8-somite stage (13 hpf)

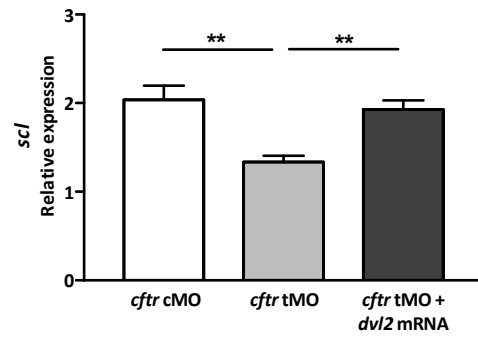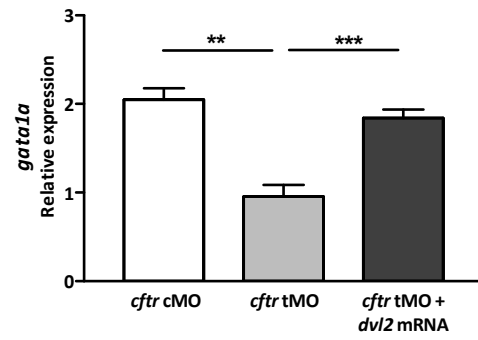

**A**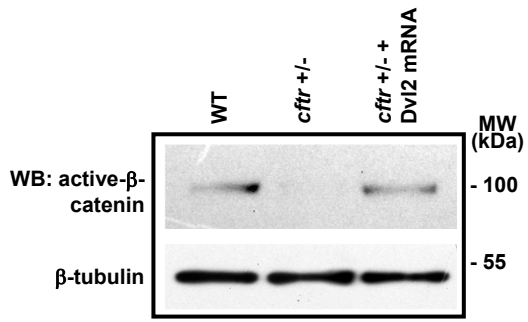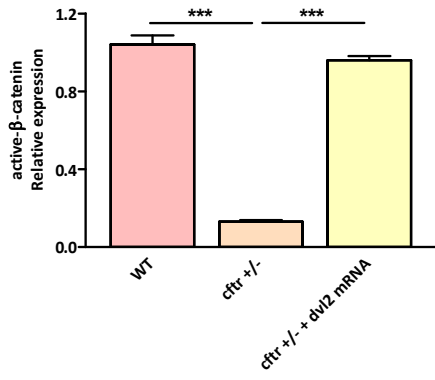**B**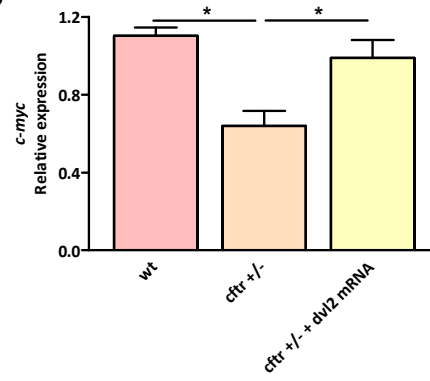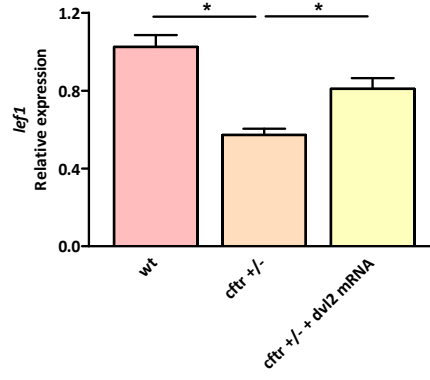

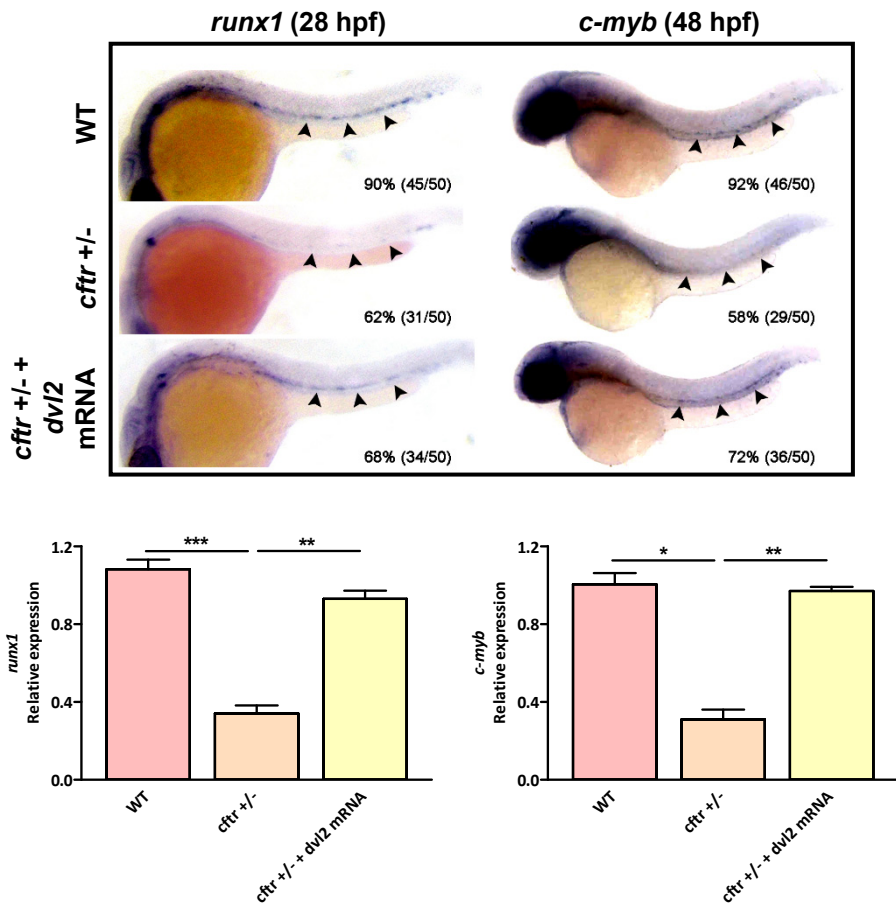



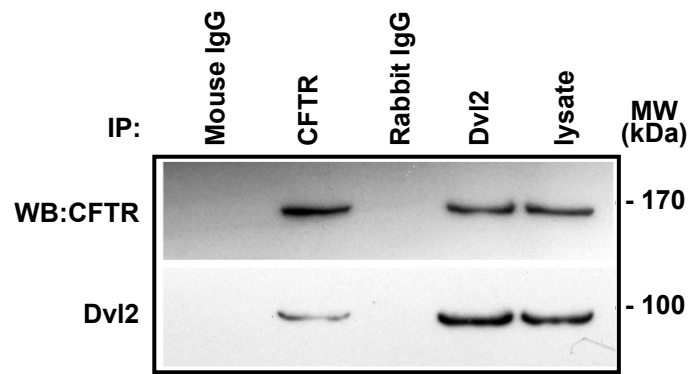

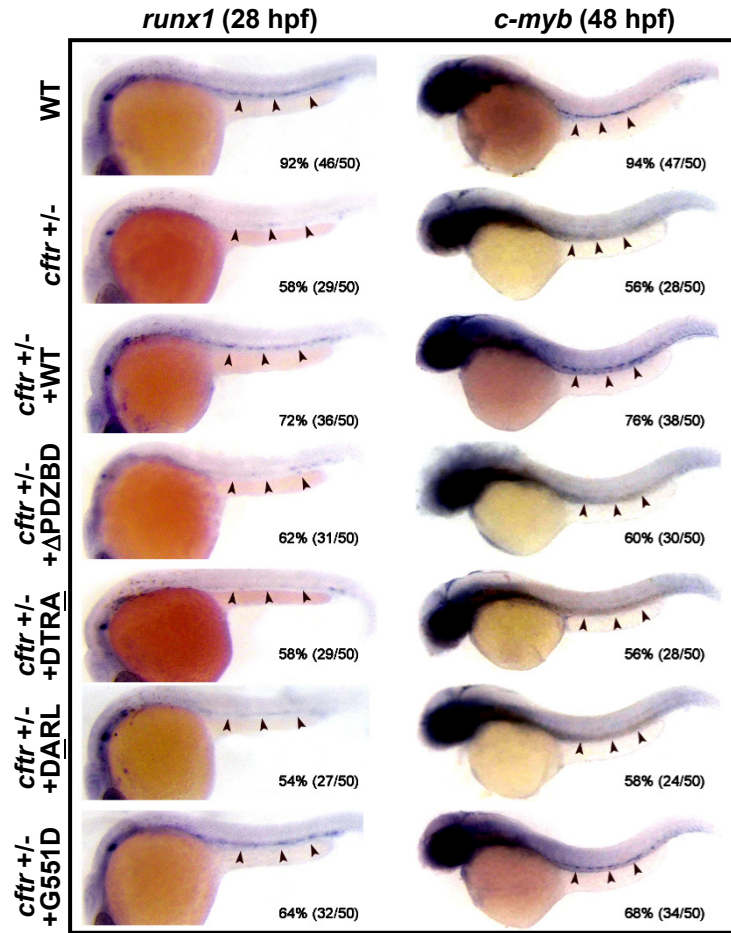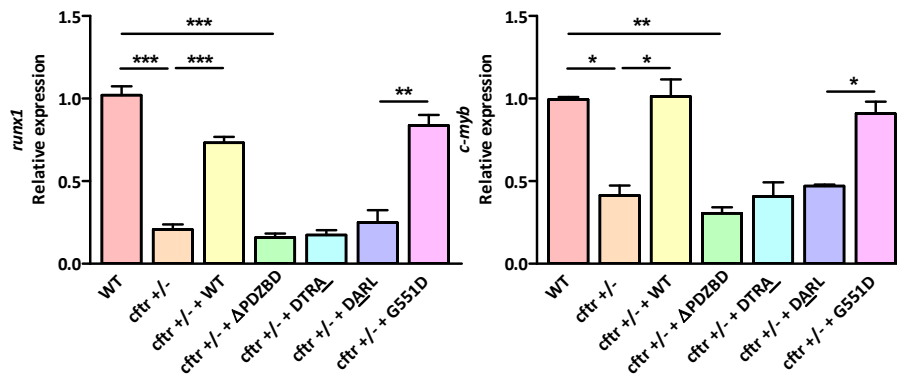

**A**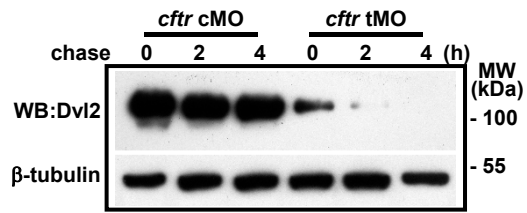**B**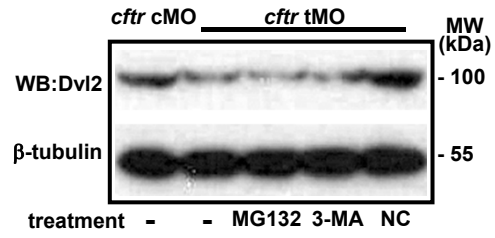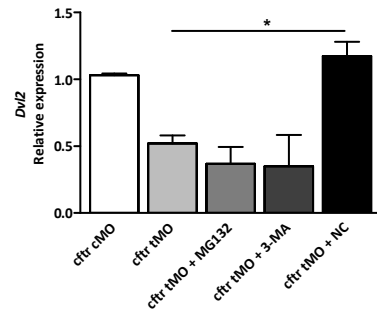

Supplement: 41419_2018_311_MOESM2_ESM.pdf [file 41419_2018_311_MOESM2_ESM.pdf]
